# Supplementary material for: Enhanced adsorption of inorganic and organic pollutants by amine modified sodium montmorillonite nanosheets
Source: Royal Society of Chemistry journal article supplement (doi:10.1039/c4ra16877a), 2015-01-01
Supplement: c4ra16877a1.pdf [file c4ra16877a1.pdf]

**SUPPORTING INFORMATION**

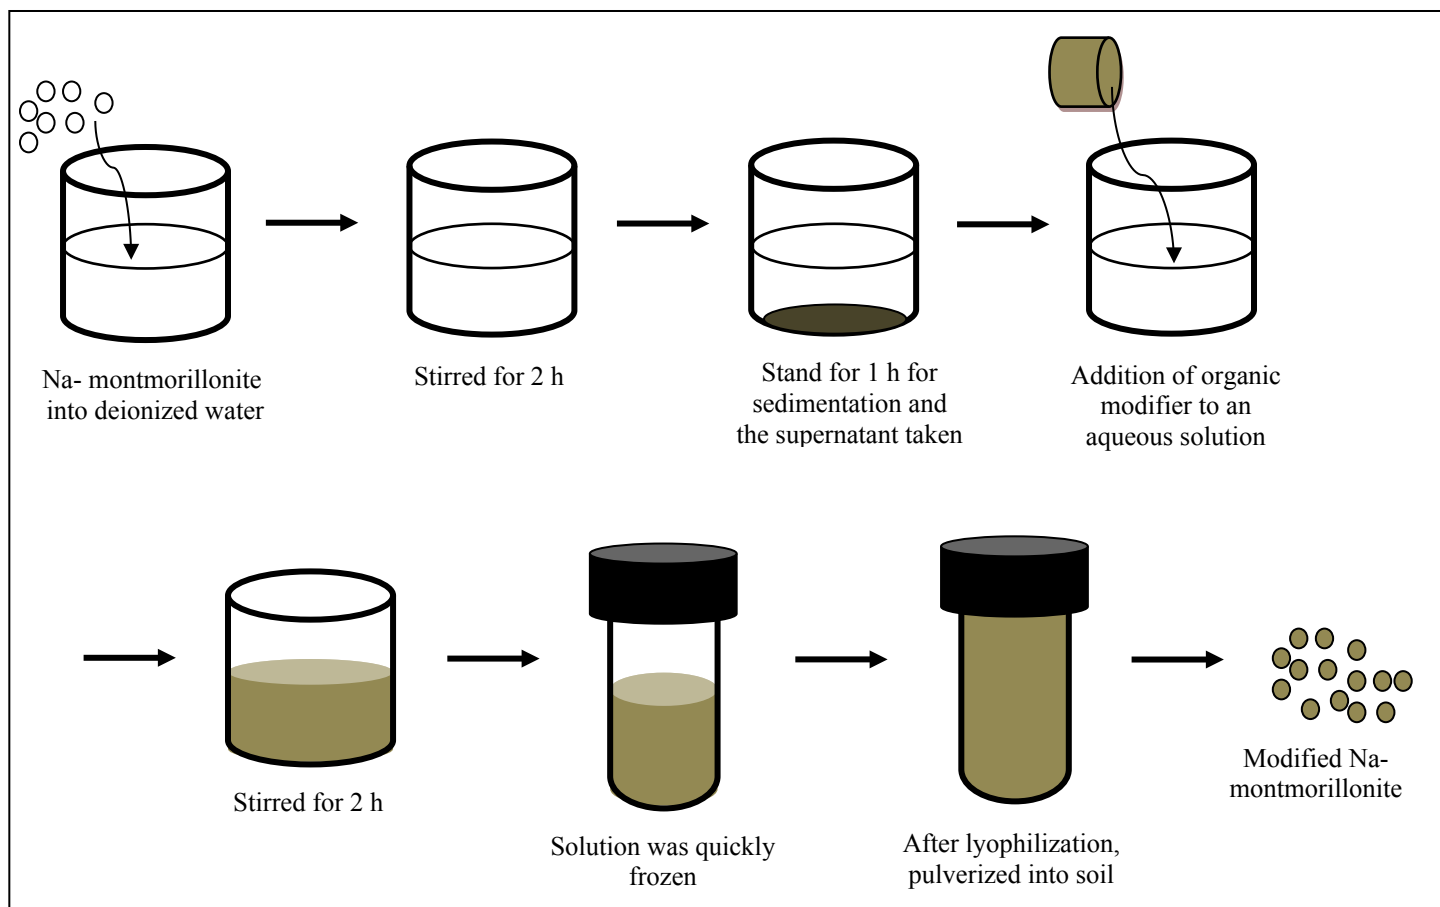

**Fig. S1:** Modification of Na-montmorillonite by different modifiers

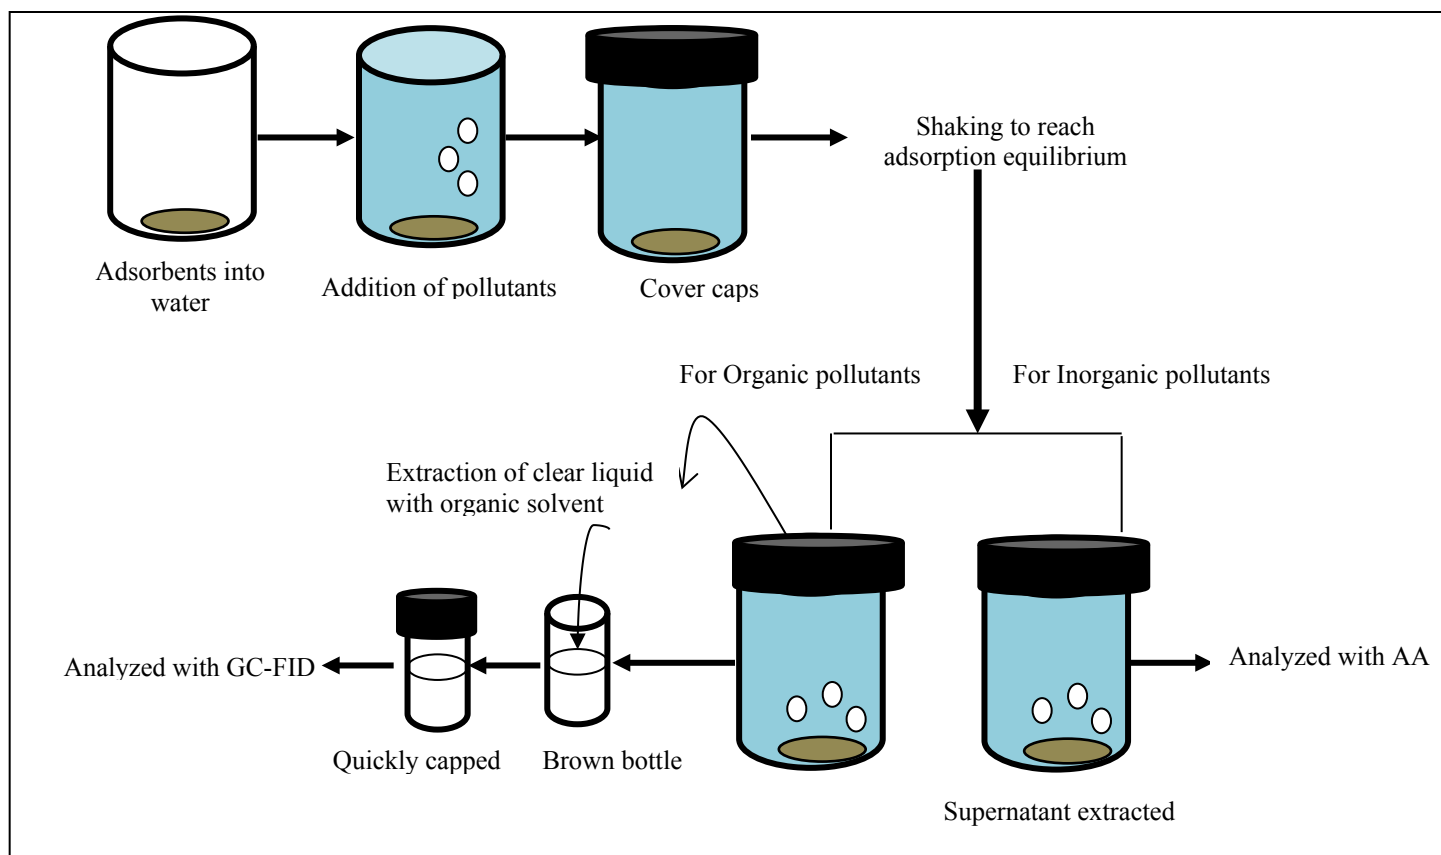

**Fig. S2:** Schematic representation of adsorption experiments
